# Supplementary material for: Female university students’ preferences for different types of sexual relationships: implications for gender-based violence prevention programs and policies
Source: PubMed Central journal article supplement (PMC7708146; doi:10.1186/s12905-020-01131-1), 2020-11-30
Supplement: 12905_2020_1131_MOESM1_ESM.pdf [file 12905_2020_1131_MOESM1_ESM.pdf]

**Vignette set A**

Please, after looking at the picture and reading the text. Answer each question ranging from 1 to 6, meaning 1= Absolutely NOT and 6= Absolutely YES. (1 is Absolutely NOT; 2 is Generally NOT; 3 is Somewhat NOT; 4 is Somewhat YES; 5 is Generally YES; 6 is Absolutely YES).

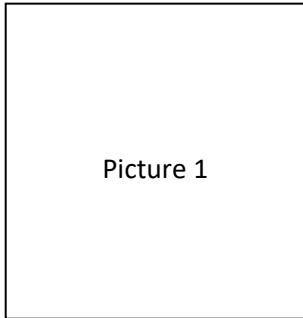

*He is rough around the edges, but his honey colored eyes, his hair style, his dominant masculinity make the girls go mad for him. My friends say he has everything: show-off, controlling, manipulative. He says precisely what they want to hear, and they hang off his every word. I heard him to tell from a girl he hooked up, that she was a slut, but actually she did not leave him alone. In his group of friends, he is the typical one that fails every single exam but is good at sport.*

|                                                          | Absolutely NOT |   |   | Absolutely YES |   |   |
|----------------------------------------------------------|----------------|---|---|----------------|---|---|
|                                                          | 1              | 2 | 3 | 4              | 5 | 6 |
| Would your friends like to hook up with him in a party?  | 1              | 2 | 3 | 4              | 5 | 6 |
| Would your friends like to have a relationship with him? | 1              | 2 | 3 | 4              | 5 | 6 |
| Would you like to hook up with him in a party?           | 1              | 2 | 3 | 4              | 5 | 6 |
| Would you like to have a relationship with him?          | 1              | 2 | 3 | 4              | 5 | 6 |

**Vignette set A**

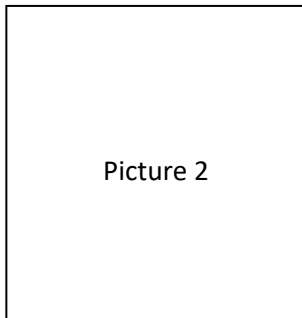

*He's totally opposite to his friend... he's really nice, studious and respectful. On the other hand he doesn't always stand up for himself, we couldn't really imagine him shouting at anyone. Should he have a stronger temper, he would attract more attention on himself. He has a penetrating look, probably some bit of innocence. A very nice guy. He sticks up for his friends and also is good with younger children.*

|                                                                 | Absolutely NOT |   |   | Absolutely YES |   |   |
|-----------------------------------------------------------------|----------------|---|---|----------------|---|---|
| <i>Would your friends like to hook up with him in a party?</i>  | 1              | 2 | 3 | 4              | 5 | 6 |
|                                                                 |                |   |   |                |   |   |
| <i>Would your friends like to have a relationship with him?</i> | 1              | 2 | 3 | 4              | 5 | 6 |
|                                                                 |                |   |   |                |   |   |
| <i>Would you like to hook up with him in a party?</i>           | 1              | 2 | 3 | 4              | 5 | 6 |
|                                                                 |                |   |   |                |   |   |
| <i>Would you like to have a relationship with him?</i>          | 1              | 2 | 3 | 4              | 5 | 6 |
|                                                                 |                |   |   |                |   |   |

**Vignette set A**

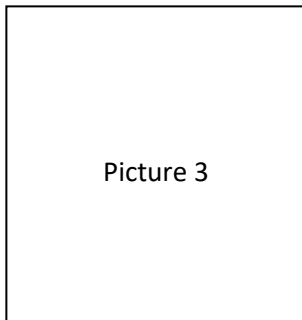

*He doesn't care about what people think; he knows how to get what he wants and uses every last trick to get it. Although initially you don't care he knows at the end you will fall down in his hands and he persistently chases you till he gets you, even though he ends up being seen as a baddie, a tricky, mysterious, maybe even controlling bloke. He laughs at the girls when they try to hook up with him. Nevertheless, if you're daring and he accepts... you could be the one. Even if he makes you cry, it's worth it.*

**Absolutely NOT**

**Absolutely YES**

|                                                                 | 1 | 2 | 3 | 4 | 5 | 6 |
|-----------------------------------------------------------------|---|---|---|---|---|---|
| <i>Would your friends like to hook up with him in a party?</i>  | 1 | 2 | 3 | 4 | 5 | 6 |
| <i>Would your friends like to have a relationship with him?</i> | 1 | 2 | 3 | 4 | 5 | 6 |
| <i>Would you like to hook up with him in a party?</i>           | 1 | 2 | 3 | 4 | 5 | 6 |
| <i>Would you like to have a relationship with him?</i>          | 1 | 2 | 3 | 4 | 5 | 6 |

**Vignette set A**

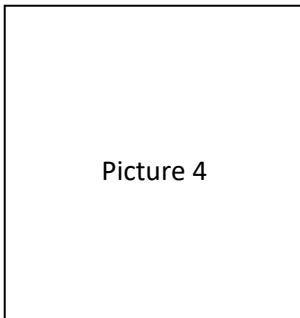

*He cares. In terms of girls, he tries to protect those who get rejected by other boys... and he listens carefully trying to find out how to help them. In fact he's kind of simple, a nice guy; he's loyal and devoted to his family and would never lie to get something.*

|                                                          | Absolutely NOT |   |   | Absolutely YES |   |   |
|----------------------------------------------------------|----------------|---|---|----------------|---|---|
| Would your friends like to hook up with him in a party?  | 1              | 2 | 3 | 4              | 5 | 6 |
| Would your friends like to have a relationship with him? | 1              | 2 | 3 | 4              | 5 | 6 |
| Would you like to hook up with him in a party?           | 1              | 2 | 3 | 4              | 5 | 6 |
| Would you like to have a relationship with him?          | 1              | 2 | 3 | 4              | 5 | 6 |

**SOCIODEMOGRAPHIC/BACKGROUND INFORMATION**

1. Age: \_\_\_\_\_

2. I was born in: \_\_\_\_\_ country: \_\_\_\_\_

3. Ethnic group:

- White
- Pakistani
- Latin
- Arab
- Chinese
- African
- Gypsy
- Any other, please describe \_\_\_\_\_

**Vignette set B**

Please, after looking at the picture and reading the text. Answer each question ranging from 1 to 6, meaning 1= Absolutely NOT and 6= Absolutely YES. (1 is Absolutely NOT; 2 is Generally NOT; 3 is Somewhat NOT; 4 is Somewhat YES; 5 is Generally YES; 6 is Absolutely YES).

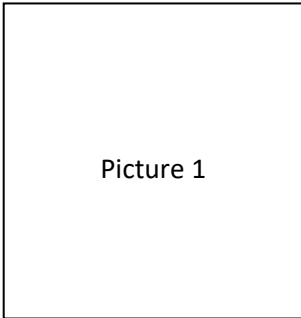

*He's totally opposite to his friend... he's really nice, studious and respectful. On the other hand he doesn't always stand up for himself, we couldn't really imagine him shouting at anyone. Should he have a stronger temper, he would attract more attention on himself. He has a penetrating look, probably some bit of innocence. A very nice guy. He sticks up for his friends and also is good with younger children.*

|                                                          | Absolutely NOT |   |   | Absolutely YES |   |   |
|----------------------------------------------------------|----------------|---|---|----------------|---|---|
|                                                          | 1              | 2 | 3 | 4              | 5 | 6 |
| Would your friends like to hook up with him in a party?  | 1              | 2 | 3 | 4              | 5 | 6 |
| Would your friends like to have a relationship with him? | 1              | 2 | 3 | 4              | 5 | 6 |
| Would you like to hook up with him in a party?           | 1              | 2 | 3 | 4              | 5 | 6 |
| Would you like to have a relationship with him?          | 1              | 2 | 3 | 4              | 5 | 6 |

**Vignette set B**

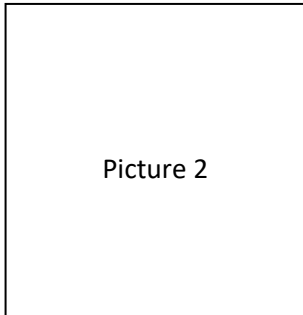

*He is rough around the edges, but his honey colored eyes, his hair style, his dominant masculinity make the girls go mad for him. My friends say he has everything: show-off, controlling, manipulative. He says precisely what they want to hear, and they hang off his every word. I heard him to tell from a girl he hooked up, that she was a slut, but actually she did not leave him alone. In his group of friends, he is the typical one that fails every single exam but is good at sport.*

|                                                                 | Absolutely NOT |   |   | Absolutely YES |   |   |
|-----------------------------------------------------------------|----------------|---|---|----------------|---|---|
|                                                                 | 1              | 2 | 3 | 4              | 5 | 6 |
| <i>Would your friends like to hook up with him in a party?</i>  | 1              | 2 | 3 | 4              | 5 | 6 |
| <i>Would your friends like to have a relationship with him?</i> | 1              | 2 | 3 | 4              | 5 | 6 |
| <i>Would you like to hook up with him in a party?</i>           | 1              | 2 | 3 | 4              | 5 | 6 |
| <i>Would you like to have a relationship with him?</i>          | 1              | 2 | 3 | 4              | 5 | 6 |

**Vignette set B**

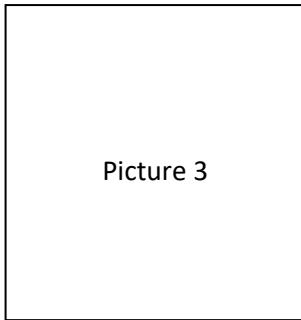

*He cares. In terms of girls, he tries to protect those who get rejected by other boys... and he listens carefully trying to find out how to help them. In fact he's kind of simple, a nice guy; he's loyal and devoted to his family and would never lie to get something.*

**Absolutely NOT**

**Absolutely YES**

|                                                                 | 1 | 2 | 3 | 4 | 5 | 6 |
|-----------------------------------------------------------------|---|---|---|---|---|---|
| <i>Would your friends like to hook up with him in a party?</i>  | 1 | 2 | 3 | 4 | 5 | 6 |
| <i>Would your friends like to have a relationship with him?</i> | 1 | 2 | 3 | 4 | 5 | 6 |
| <i>Would you like to hook up with him in a party?</i>           | 1 | 2 | 3 | 4 | 5 | 6 |
| <i>Would you like to have a relationship with him?</i>          | 1 | 2 | 3 | 4 | 5 | 6 |

**Vignette set B**

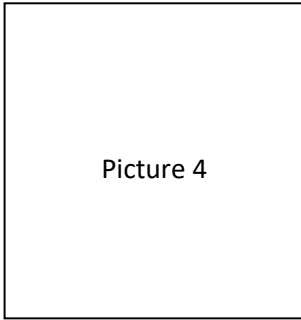

*He doesn't care about what people think; he knows how to get what he wants and uses every last trick to get it. Although initially you don't care he knows at the end you will fall down in his hands and he persistently chases you till he gets you, even though he ends up being seen as a baddie, a tricky, mysterious, maybe even controlling bloke. He laughs at the girls when they try to hook up with him. Nevertheless, if you're daring and he accepts... you could be the one. Even if he makes you cry, it's worth it.*

**Absolutely NOT**

**Absolutely YES**

|                                                                 |   |   |   |   |   |   |
|-----------------------------------------------------------------|---|---|---|---|---|---|
| <i>Would your friends like to hook up with him in a party?</i>  | 1 | 2 | 3 | 4 | 5 | 6 |
|                                                                 |   |   |   |   |   |   |
| <i>Would your friends like to have a relationship with him?</i> | 1 | 2 | 3 | 4 | 5 | 6 |
|                                                                 |   |   |   |   |   |   |
| <i>Would you like to hook up with him in a party?</i>           | 1 | 2 | 3 | 4 | 5 | 6 |
|                                                                 |   |   |   |   |   |   |
| <i>Would you like to have a relationship with him?</i>          | 1 | 2 | 3 | 4 | 5 | 6 |
|                                                                 |   |   |   |   |   |   |

**SOCIODEMOGRAPHIC/BACKGROUND INFORMATION**

1. Age: \_\_\_\_\_

2. I was born in: \_\_\_\_\_ country: \_\_\_\_\_

3. Ethnic group:

- White
- Pakistani
- Latin
- Arab
- Chinese
- African
- Gypsy
- Any other, please describe \_\_\_\_\_



**Vignette set C**

Please, after looking at the picture and reading the text. Answer each question ranging from 1 to 6, meaning 1= Absolutely NOT and 6= Absolutely YES. (1 is Absolutely NOT; 2 is Generally NOT; 3 is Somewhat NOT; 4 is Somewhat YES; 5 is Generally YES; 6 is Absolutely YES).

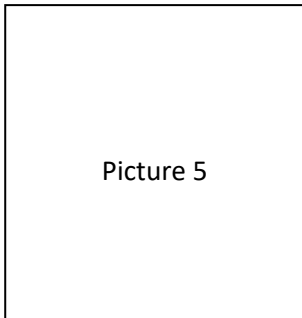

*He is a funny bastard. He seems disinterested in girls and can't even remember their names after hooking up with them... In fact, he laughs at his friends who act like that... by that point some girls like to be with him again and he disdains them persistently. He is not as sensible and good as his friends are but his strong temper makes him somebody interesting to be discovered. Lots have tried to. He is someone to be rescued. He has a difficult personality.*

|                                                          | Absolutely NOT |   |   | Absolutely YES |   |   |
|----------------------------------------------------------|----------------|---|---|----------------|---|---|
|                                                          | 1              | 2 | 3 | 4              | 5 | 6 |
| Would your friends like to hook up with him in a party?  | 1              | 2 | 3 | 4              | 5 | 6 |
| Would your friends like to have a relationship with him? | 1              | 2 | 3 | 4              | 5 | 6 |
| Would you like to hook up with him in a party?           | 1              | 2 | 3 | 4              | 5 | 6 |
| Would you like to have a relationship with him?          | 1              | 2 | 3 | 4              | 5 | 6 |

**Vignette set C**

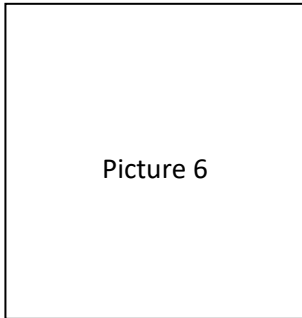

*He is the boy every girl dreams to be with for the rest of her life; well-mannered, courteous, respectful of everyone. He knows how to treat girls as queens. He cares and is attentive. My friends say it's a pity he is not more manly.*

|                                                                 | Absolutely NOT |   |   | Absolutely YES |   |   |
|-----------------------------------------------------------------|----------------|---|---|----------------|---|---|
|                                                                 | 1              | 2 | 3 | 4              | 5 | 6 |
| <i>Would your friends like to hook up with him in a party?</i>  | 1              | 2 | 3 | 4              | 5 | 6 |
| <i>Would your friends like to have a relationship with him?</i> | 1              | 2 | 3 | 4              | 5 | 6 |
| <i>Would you like to hook up with him in a party?</i>           | 1              | 2 | 3 | 4              | 5 | 6 |
| <i>Would you like to have a relationship with him?</i>          | 1              | 2 | 3 | 4              | 5 | 6 |

**Vignette set C**

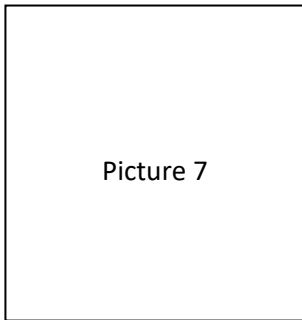

*You want not to like him but his hypnotic eyes will hook you. You will probably be another girl he's been with but most are not ashamed to admit they dream to be the one to save him. Despite of the fact that he has touched them without consent they believe they can change him. He's totally the hottest boy. His personality is scary but it will make you drool.*

|                                                                 | Absolutely NOT |   |   | Absolutely YES |   |   |
|-----------------------------------------------------------------|----------------|---|---|----------------|---|---|
|                                                                 | 1              | 2 | 3 | 4              | 5 | 6 |
| <i>Would your friends like to hook up with him in a party?</i>  | 1              | 2 | 3 | 4              | 5 | 6 |
| <i>Would your friends like to have a relationship with him?</i> | 1              | 2 | 3 | 4              | 5 | 6 |
| <i>Would you like to hook up with him in a party?</i>           | 1              | 2 | 3 | 4              | 5 | 6 |
| <i>Would you like to have a relationship with him?</i>          | 1              | 2 | 3 | 4              | 5 | 6 |

**Vignette set C**

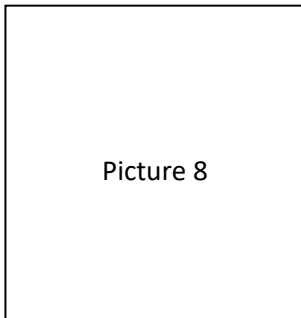

*Open and friendly, he makes girls feel comfortable. He's nice, funny, dedicated and makes interesting conversations. He is the good-hearted guy that mothers love.*

**Absolutely NOT**

**Absolutely YES**

|                                                                 |   |   |   |   |   |   |
|-----------------------------------------------------------------|---|---|---|---|---|---|
| <i>Would your friends like to hook up with him in a party?</i>  | 1 | 2 | 3 | 4 | 5 | 6 |
|                                                                 |   |   |   |   |   |   |
| <i>Would your friends like to have a relationship with him?</i> | 1 | 2 | 3 | 4 | 5 | 6 |
|                                                                 |   |   |   |   |   |   |
| <i>Would you like to hook up with him in a party?</i>           | 1 | 2 | 3 | 4 | 5 | 6 |
|                                                                 |   |   |   |   |   |   |
| <i>Would you like to have a relationship with him?</i>          | 1 | 2 | 3 | 4 | 5 | 6 |
|                                                                 |   |   |   |   |   |   |

**SOCIODEMOGRAPHIC/BACKGROUND INFORMATION**

1. Age: \_\_\_\_\_

2. I was born in: \_\_\_\_\_ country: \_\_\_\_\_

3. Ethnic group:

- White
- Pakistani
- Latin
- Arab
- Chinese
- African
- Gypsy
- Any other, please describe \_\_\_\_\_
